# Supplementary material for: Promoting Beneficial Arthropods in Urban Agroecosystems: Focus on Flowers, Maybe Not Native Plants
Source: MDPI journal article supplement (doi:10.3390/insects14070576), 2023-06-23

## Article

# Promoting beneficial arthropods in urban agroecosystems: focus on flowers, Maybe not native plants

Stacy M Philpott <sup>1\*</sup>, Azucena Lucatero <sup>1</sup>, Sofie Andrade <sup>2</sup>, Cameron Hernandez <sup>1</sup>, Peter Bichier<sup>1</sup>

<sup>1</sup> Environmental Studies Department, University of California, Santa Cruz, USA; sphilpot@ucsc.edu

<sup>2</sup> Ecology and Evolutionary Biology Department, University of California, Santa Cruz, USA

\* Correspondence: sphilpot@ucsc.edu; Tel.: +01-831-459-1549

## Supplementary Material

**Table S1.** List of ground-foraging spider, ladybeetle, bee and ant species encountered, abundance across all sites and years, and native status.

| Species                   | No. indiv. | Native Status | Source   |
|---------------------------|------------|---------------|----------|
| <b>ARANAE - SPIDERS</b>   |            |               |          |
| <i>Amaurobiidae</i> sp. 1 | 2          | Likely Native | [66]     |
| <i>Amaurobiidae</i> sp. 2 | 1          | Likely Native | [66]     |
| <i>Anyphaenidae</i> sp. 1 | 1          | Unknown       | [66]     |
| <i>Araneidae</i> sp. 1    | 2          | Unknown       | [66]     |
| <i>Araneidae</i> sp. 2    | 3          | Unknown       | [66]     |
| <i>Caponiidae</i> sp. 1   | 7          | Native        | [66]     |
| <i>Clubionidae</i> sp. 1  | 2          | Unknown       | [66]     |
| <i>Clubionidae</i> sp. 2  | 1          | Unknown       | [66]     |
| <i>Corinnidae</i> sp. 1   | 3          | Unknown       | [66]     |
| <i>Corinnidae</i> sp. 2   | 1          | Unknown       | [66]     |
| <i>Corinnidae</i> sp. 3   | 6          | Unknown       | [66]     |
| <i>Corinnidae</i> sp. 4   | 1          | Unknown       | [66]     |
| <i>Corinnidae</i> sp. 5   | 21         | Unknown       | [66]     |
| <i>Cybaeidae</i> sp. 1    | 4          | Likely Native | [66]     |
| <i>Dictynidae</i> sp. 1   | 2          | Likely Native | [66]     |
| <i>Drassyllus</i> saphes  | 66         | Native        | [67]     |
| <i>Dysdera</i> crocata    | 66         | Not-Native    | [66, 67] |
| <i>Hahnidae</i> sp. 1     | 2          | Likely Native | [66]     |
| <i>Linyphiidae</i> sp. 1  | 18         | Likely Native | [66]     |
| <i>Linyphiidae</i> sp. 2  | 3          | Likely Native | [66]     |
| <i>Linyphiidae</i> sp. 3  | 4          | Likely Native | [66]     |
| <i>Micaria</i> utahna     | 35         | Native        | [67]     |
| <i>Miturgidae</i> sp. 1   | 3          | Not-Native    | [66]     |
| <i>Miturgidae</i> sp. 2   | 1          | Not-Native    | [66]     |

|                                                |      |               |          |
|------------------------------------------------|------|---------------|----------|
| <i>Nesticidae sp. 1</i>                        | 41   | Likely Native | [66]     |
| <i>Nesticidae sp. 2</i>                        | 60   | Likely Native | [66]     |
| <i>Nesticidae sp. 3</i>                        | 1    | Likely Native | [66]     |
| <i>Oecobiidae sp. 1</i>                        | 11   | Unknown       | [66]     |
| <i>Oecobiidae sp. 2</i>                        | 7    | Unknown       | [66]     |
| <i>Oonopidae sp. 1</i>                         | 1    | Unknown       | [66]     |
| <i>Oxyopidae sp. 1</i>                         | 1    | Native        | [66]     |
| <i>Pardosa sierra</i>                          | 976  | Native        | [67, 68] |
| <i>Pholcidae sp. 1</i>                         | 2    | Unknown       | [66]     |
| <i>Pholcidae sp. 2</i>                         | 2    | Unknown       | [66]     |
| <i>Pimoidae sp. 1</i>                          | 2    | Likely Native | [66]     |
| <i>Pimoidae sp. 2</i>                          | 1    | Likely Native | [66]     |
| <i>Salticidae sp. 1</i>                        | 1    | Unknown       | [66]     |
| <i>Salticidae sp. 2</i>                        | 5    | Unknown       | [66]     |
| <i>Salticidae sp. 3</i>                        | 2    | Unknown       | [66]     |
| <i>Schizocosa mccoocki</i>                     | 8    | Native        | [67, 68] |
| <i>Theridiidae sp. 1</i>                       | 5    | Unknown       | [66]     |
| <i>Theridiidae sp. 2</i>                       | 1    | Unknown       | [66]     |
| <i>Thomisidae sp. 1</i>                        | 1    | Likely Native | [66]     |
| <i>Thomisidae sp. 2</i>                        | 1    | Likely Native | [66]     |
| <i>Trachyzelotes barbatus</i>                  | 81   | Not-Native    | [67, 68] |
| <i>Urozelotes rusticus</i>                     | 67   | Not-Native    | [66, 67] |
| <b>COLEOPTERA: COCCINELLIDAE - LADYBEETLES</b> |      |               |          |
| <i>Adalia bipunctata</i>                       | 1    | Native        | [64]     |
| <i>Coccinella californica</i>                  | 26   | Native        | [64]     |
| <i>Coccinella septempunctata</i>               | 17   | Not-Native    | [64]     |
| <i>Cycloneda munda</i>                         | 14   | Native        | [52]     |
| <i>Cycloneda polita</i>                        | 9    | Native        | [64]     |
| <i>Cycloneda sanguinea</i>                     | 35   | Native        | [64]     |
| <i>Harmonia axyridis</i>                       | 91   | Not-Native    | [64]     |
| <i>Hippodamia convergens</i>                   | 91   | Native        | [64]     |
| <i>Hyperaspis quadrioculata</i>                | 12   | Native        | [64]     |
| <i>Hyperaspis sp. A</i>                        | 2    | Native        | [65]     |
| <i>Nephus binaevatus</i>                       | 12   | Not-Native    | [64]     |
| <i>Olla v-nigrum</i>                           | 1    | Native        | [64]     |
| <i>Psyllobora vigintimaculata</i>              | 1109 | Native        | [64]     |
| <i>Scymnus cervicalis</i>                      | 1    | Native        | [64]     |
| <i>Scymnus coniferarum</i>                     | 2    | Native        | [64]     |
| <i>Scymnus marginicollis</i>                   | 22   | Native        | [64]     |
| <i>Scymnus nebulosus</i>                       | 1    | Native        | [64]     |
| <i>Scymnus sp. 1</i>                           | 3    | Native        | [65]     |
| <i>Scymnus sp. A</i>                           | 5    | Native        | [65]     |

|                             |      |               |          |
|-----------------------------|------|---------------|----------|
| <i>Stethorus punctum</i>    | 112  | Native        | [64]     |
| <b>HYMENOPTERA - BEES</b>   |      |               |          |
| <i>Agapostemon sp. A</i>    | 3    | Likely Native | [61, 62] |
| <i>Agapostemon texanus</i>  | 150  | Native        | [61]     |
| <i>Andrena sp. 1</i>        | 1    | Likely Native | [62]     |
| <i>Andrena sp. 2</i>        | 3    | Likely Native | [62]     |
| <i>Andrena sp. A</i>        | 1    | Likely Native | [62]     |
| <i>Anthidium manicatum</i>  | 2    | Native        | [62]     |
| <i>Anthophora urbana</i>    | 7    | Native        | [62]     |
| <i>Anthophora sp. 1</i>     | 2    | Likely Native | [62]     |
| <i>Anthophora sp. 2</i>     | 1    | Likely Native | [62]     |
| <i>Anthophora sp. A</i>     | 1    | Likely Native | [62]     |
| <i>Apis mellifera</i>       | 2544 | Not-Native    | [62]     |
| <i>Ashmeadiella buconis</i> | 6    | Native        | [61]     |
| <i>Ashmeadiella sp. 1</i>   | 1    | Native        | [61]     |
| <i>Bombus californicus</i>  | 1    | Native        | [62]     |
| <i>Bombus caliginosus</i>   | 153  | Native        | [62]     |
| <i>Bombus vosnesenskii</i>  | 224  | Native        | [62]     |
| <i>Ceratina acantha</i>     | 70   | Native        | [61]     |
| <i>Ceratina nanula</i>      | 27   | Native        | [62]     |
| <i>Ceratina sequoiae</i>    | 1    | Native        | [62]     |
| <i>Ceratina sp. 1</i>       | 21   | Likely Native | [61, 62] |
| <i>Ceratina sp. 2</i>       | 10   | Likely Native | [61, 62] |
| <i>Coelioxys rufitarsis</i> | 2    | Native        | [62]     |
| <i>Coelioxys sp. 1</i>      | 1    | Likely Native | [62]     |
| <i>Colletes sp. A</i>       | 7    | Likely Native | [62]     |
| <i>Diadasia sp. 1</i>       | 3    | Native        | [61]     |
| <i>Dufourea sp. A</i>       | 1    | Likely Native | [61]     |
| <i>Eucera actiosa</i>       | 4    | Native        | [62]     |
| <i>Eucera sp. A</i>         | 1    | Likely Native | [62]     |
| <i>Halictus confusus</i>    | 3    | Native        | [61]     |
| <i>Halictus farinosus</i>   | 11   | Native        | [62]     |
| <i>Halictus ligatus</i>     | 79   | Native        | [61]     |
| <i>Halictus rubicundus</i>  | 4    | Native        | [62]     |
| <i>Halictus tripartitus</i> | 1328 | Native        | [61]     |
| <i>Halictus sp. 1</i>       | 1    | Native        | [61]     |
| <i>Halictus sp. 2</i>       | 4    | Native        | [61]     |
| <i>Halictus sp. A</i>       | 4    | Native        | [61]     |
| <i>Holcopasites sp. A</i>   | 1    | Native        | [62]     |
| <i>Hylaeus leptcephalus</i> | 21   | Not-Native    | [62]     |
| <i>Hylaeus mesillae</i>     | 106  | Native        | [62]     |
| <i>Hylaeus panamensis</i>   | 13   | Native        | [62]     |

|                                             |     |               |      |
|---------------------------------------------|-----|---------------|------|
| <i>Hylaeus polifolii</i>                    | 7   | Native        | [63] |
| <i>Hylaeus punctatus</i>                    | 58  | Not-Native    | [63] |
| <i>Hylaeus rudbeckiae</i>                   | 98  | Native        | [62] |
| <i>Hylaeus</i> sp. 1                        | 34  | Unknown       | NA   |
| <i>Hylaeus</i> sp. 2                        | 3   | Unknown       | NA   |
| <i>Hylaeus</i> sp. 3                        | 2   | Unknown       | NA   |
| <i>Hylaeus</i> sp. A                        | 6   | Unknown       | NA   |
| <i>Hylaeus</i> sp. B                        | 1   | Unknown       | NA   |
| <i>Hylaeus</i> sp. C                        | 12  | Unknown       | NA   |
| <i>Lasioglossum (Dialictus) incompletum</i> | 1   | Likely Native | [63] |
| <i>Lasioglossum (Dialictus) sp. A</i>       | 139 | Likely Native | [62] |
| <i>Lasioglossum (Evylaeus) sp. A</i>        | 7   | Likely Native | [62] |
| <i>Lasioglossum (Lasioglossum) sp. A</i>    | 39  | Likely Native | [62] |
| <i>Lasioglossum</i> sp. 1                   | 4   | Likely Native | [62] |
| <i>Lasioglossum</i> sp. 2                   | 3   | Likely Native | [62] |
| <i>Lasioglossum</i> sp. 3                   | 13  | Likely Native | [62] |
| <i>Lasioglossum</i> sp. 4                   | 1   | Likely Native | [62] |
| <i>Lasioglossum</i> sp. 5                   | 10  | Likely Native | [62] |
| <i>Lasioglossum</i> sp. 6                   | 7   | Likely Native | [62] |
| <i>Lasioglossum</i> sp. 7                   | 2   | Likely Native | [62] |
| <i>Lasioglossum</i> sp. 8                   | 2   | Likely Native | [62] |
| <i>Lasioglossum</i> sp. 9                   | 2   | Likely Native | [62] |
| <i>Lasioglossum</i> sp. 10                  | 1   | Likely Native | [62] |
| <i>Lasioglossum</i> sp. 11                  | 1   | Likely Native | [62] |
| <i>Lasioglossum</i> sp. 12                  | 4   | Likely Native | [62] |
| <i>Lasioglossum</i> sp. 13                  | 5   | Likely Native | [62] |
| <i>Lasioglossum</i> sp. 14                  | 111 | Likely Native | [62] |
| <i>Lasioglossum</i> sp. 15                  | 4   | Likely Native | [62] |
| <i>Lasioglossum</i> sp. A                   | 43  | Likely Native | [62] |
| <i>Martinapis</i> sp. 1                     | 1   | Likely Native | [62] |
| <i>Megachile apicalis</i>                   | 1   | Not-Native    | [63] |
| <i>Megachile brevis</i>                     | 4   | Native        | [62] |
| <i>Megachile latimanus</i>                  | 1   | Native        | [62] |
| <i>Megachile mendica</i>                    | 1   | Native        | [62] |
| <i>Megachile perihirta</i>                  | 30  | Native        | [61] |
| <i>Megachile relativa</i>                   | 1   | Native        | [62] |
| <i>Megachile rotundata</i>                  | 7   | Not-Native    | [61] |
| <i>Megachile</i> sp. 1                      | 1   | Unknown       | NA   |
| <i>Megachile</i> sp. 2                      | 3   | Unknown       | NA   |
| <i>Megachile</i> sp. 3                      | 7   | Unknown       | NA   |
| <i>Megachile</i> sp. 4                      | 1   | Unknown       | NA   |
| <i>Megachile</i> sp. 5                      | 1   | Unknown       | NA   |

|                                       |     |               |          |
|---------------------------------------|-----|---------------|----------|
| <i>Megachile sp. A</i>                | 1   | Unknown       | NA       |
| <i>Megachile sp. B</i>                | 2   | Unknown       | NA       |
| <i>Melissodes robustior</i>           | 100 | Native        | [61]     |
| <i>Melissodes sp. 1</i>               | 27  | Native        | [61]     |
| <i>Melissodes sp. 2</i>               | 2   | Native        | [61]     |
| <i>Melissodes sp. A</i>               | 1   | Native        | [61]     |
| <i>Melissodes sp. B</i>               | 8   | Native        | [61]     |
| <i>Nomada edwardsii</i>               | 2   | Native        | [61]     |
| <i>Nomada sp. A</i>                   | 4   | Likely Native | [62]     |
| <i>Osmia sp. 1</i>                    | 1   | Likely Native | [62]     |
| <i>Peponapis pruinosa</i>             | 7   | Native        | [61]     |
| <i>Peponapis sp. A</i>                | 1   | Native        | [61, 62] |
| <i>Sphecodes sp. 1</i>                | 3   | Unknown       | NA       |
| <i>Sphecodes sp. A</i>                | 3   | Unknown       | NA       |
| <i>Svastra aegis</i>                  | 2   | Native        | [61]     |
| <i>Xylocopa tabaniformis</i>          | 36  | Native        | [61]     |
| <i>Xylocopa varipuncta</i>            | 47  | Native        | [62]     |
| Unknown Unknown                       | 4   | Unknown       | NA       |
| <b>HYMENOPTERA: FORMICIDAE - ANTS</b> |     |               |          |
| <i>Cardiocondyla mauritanica</i>      | 123 | Not-Native    | [69]     |
| <i>Formica moki</i>                   | 1   | Native        | [69]     |
| <i>Hypoponera opacior</i>             | 106 | Native        | [69]     |
| <i>Linepithema humile</i>             | 369 | Not-Native    | [59]     |
| <i>Nylanderia vividula</i>            | 36  | Not-Native    | [59]     |
| <i>Prenolepis imparis</i>             | 5   | Native        | [69]     |
| <i>Tapinoma sessile</i>               | 11  | Native        | [69]     |
| <i>Tetramorium caespitum</i>          | 75  | Not-Native    | [59]     |

14

15

16

**Table S2.** List of all native plant species encountered in urban community gardens in the California central coast, and their relative abundance as a fraction of total and native plant species cover.

| Family        | Genus                | Species             | Species or morphospecies or common name | % of total native cover | % of all plant cover |
|---------------|----------------------|---------------------|-----------------------------------------|-------------------------|----------------------|
| Amaranthaceae | <i>Amaranthus</i>    | <i>palmeri</i>      | Pigweed                                 | 3.57                    | 0.09                 |
| Apocynaceae   | <i>Asclepias</i>     | <i>fascicularis</i> | Milkweed                                | 0.22                    | 0.01                 |
| Asteraceae    | <i>Achillea</i>      | <i>millefolium</i>  | Yarrow                                  | 5.58                    | 0.14                 |
| Asteraceae    | <i>Cirsium</i>       | <i>douglasii</i>    | Thistle                                 | 1.34                    | 0.03                 |
| Asteraceae    | <i>Erigeron</i>      | <i>canadensis</i>   | Horseweed                               | 1.23                    | 0.03                 |
| Asteraceae    | <i>Helianthus</i>    | <i>annuus</i>       | Sunflower                               | 39.04                   | 0.99                 |
| Asteraceae    | <i>Matricaria</i>    | <i>discoidea</i>    | Pineapple weed                          | 0.17                    | 0.00                 |
| Boraginaceae  | <i>Phacelia</i>      | <i>sp.</i>          | Scorpionweed                            | 1.67                    | 0.04                 |
| Boraginaceae  | <i>Plagiobothrys</i> | <i>sp.</i>          | Popcorn flower                          | 2.51                    | 0.06                 |
| Brassicaceae  | <i>Cardamine</i>     | <i>oligosperma</i>  | Popweed                                 | 0.17                    | 0.00                 |
| Brassicaceae  | <i>Nasturtium</i>    | <i>officinale</i>   | Watercress                              | 1.51                    | 0.04                 |
| Equisetaceae  | <i>Equisetum</i>     | <i>sp.</i>          | Horsetail                               | 0.84                    | 0.02                 |
| Lamiaceae     | <i>Salvia</i>        | <i>mellifera</i>    | Black sage                              | 1.56                    | 0.04                 |
| Montiaceae    | <i>Claytonia</i>     | <i>sp.</i>          | Miner's lettuce                         | 0.11                    | 0.00                 |
| Onagraceae    | <i>Clarkia</i>       | <i>sp.</i>          | Clarkia                                 | 0.73                    | 0.02                 |
| Onagraceae    | <i>Epilobium</i>     | <i>sp.</i>          | Fireweed                                | 3.90                    | 0.10                 |
| Orobanchaceae | <i>Castilleja</i>    | <i>exserta</i>      | Owl's clover                            | 0.06                    | 0.00                 |
| Papaveraceae  | <i>Eschscholzia</i>  | <i>californica</i>  | California poppy                        | 28.56                   | 0.72                 |
| Pteriadaceae  | <i>Adiantum</i>      | <i>sp.</i>          | Maiden-hair fern                        | 0.11                    | 0.00                 |
| Ranunculaceae | <i>Delphinium</i>    | <i>sp.</i>          | Larkspur                                | 7.14                    | 0.18                 |

**Table S3.** Model output from GLMM (bees and ladybeetles) and GLM (spiders and ants) models testing relationships between arthropod and native arthropod abundance and richness and local and landscape features of urban agroecosystems.

| Dependent variable              | Model reported | Predictor Variables in Model | No. of models | Estimate | z or t score* | p-value |
|---------------------------------|----------------|------------------------------|---------------|----------|---------------|---------|
| LNBeIndiv                       | best           | (Intercept)                  | 1             | 4.956    | 14.728        | <0.001  |
|                                 |                | LNGardenSize                 | 1             | 0.297    | 3.719         | <0.001  |
| LNNumNativeLikelyNativeBeeIndiv | average        | (Intercept)                  | 4             | 4.301    | 11.937        | <0.001  |
|                                 |                | LNGardenSize                 | 2             | 0.303    | 2.349         | 0.019   |
|                                 |                | LNNumNativePlantSpp          | 2             | -0.392   | 1.601         | 0.1094  |
| LNNumNativeBeeIndiv             | best           | (Intercept)                  | 4             | 4.154    | 9.023         | <0.001  |
|                                 |                | LNGardenSize                 | 2             | 0.333    | 2.351         | 0.018   |
|                                 |                | LNNumNativePlantSpp          | 2             | -0.475   | 1.777         | 0.076   |
| NumNonNativeBeeIndiv            | average        | (Intercept)                  | 2             | 3.737    | 7.421         | <0.001  |
|                                 |                | Natural2km                   | 2             | 0.016    | 4.176         | <0.001  |
|                                 |                | LNGardenSize                 | 1             | 0.203    | 2.235         | 0.0254  |
| NumBeeSpp                       | average        | (Intercept)                  | 3             | 15.21    | 6.296         | <0.001  |
|                                 |                | LNGardenSize                 | 3             | 2.056    | 2.987         | 0.003   |
|                                 |                | LNNumNativePlantSpp          | 1             | -0.81    | 0.627         | 0.53    |
|                                 |                | LNNumTreesShrubs             | 1             | 0.074    | 0.122         | 0.903   |
| NumNativeLikelyNativeBeeSpp     | average        | (Intercept)                  | 2             | 12.008   | 6.05          | <0.001  |
|                                 |                | LNGardenSize                 | 2             | 1.806    | 3.338         | <0.001  |
|                                 |                | LNNumNativePlantSpp          | 1             | -0.554   | 0.542         | 0.587   |
| NumNativeBeeSpp                 | average        | (Intercept)                  | 2             | 8.135    | 3.946         | <0.001  |
|                                 |                | LNGardenSize                 | 2             | 1.525    | 3.007         | 0.003   |
|                                 |                | LNNumNativePlantSpp          | 1             | -0.009   | 0.01          | 0.992   |
| NumNonNativeBeeSpp              | best           | (Intercept)                  | 1             | 0.461    | 2.236         | 0.175   |
| LNNumLBIndiv                    | average        | (Intercept)                  | 2             | 3.566    | 13.268        | <0.001  |
|                                 |                | Natural2km                   | 1             | -0.018   | 3.124         | 0.002   |
| LNNumNativeLBIndiv              | best           | (Intercept)                  | 1             | 3.3695   | 17.15         | <0.001  |
| LNNonNativeLBIndiv              | best           | (Intercept)                  | 1             | 1.132    | 8.333         | 0.013   |
| NumLBSpp                        | average        | (Intercept)                  | 3             | 4.614    | 4.28          | <0.001  |
|                                 |                | LNNumTreesShrubs             | 3             | 1.038    | 3.393         | <0.001  |
|                                 |                | Natural2km                   | 3             | -0.061   | 3.987         | <0.001  |
|                                 |                | LNNumNativePlantSpp          | 1             | -0.482   | 0.787         | 0.431   |
|                                 |                | LNNumFlowers                 | 1             | -0.391   | 1.195         | 0.231   |
| NumNativeLBSpp                  | average        | (Intercept)                  | 3             | 3.963    | 5.736         | <0.001  |
|                                 |                | LNNumTreesShrubs             | 2             | 0.558    | 1.885         | 0.059   |
|                                 |                | Natural2km                   | 1             | -0.042   | 3.28          | 0.001   |
|                                 |                | LNNumNativePlantSpp          | 1             | -0.041   | 0.074         | 0.941   |
| NonNativeLBSpp                  | best           | (Intercept)                  | 1             | 1.0811   | 8.271         | 0.032   |

26  
27  
28

|                                |         |                  |   |        |        |        |
|--------------------------------|---------|------------------|---|--------|--------|--------|
| LNNumSpiders                   | average | (Intercept)      | 6 | 3.655  | 4.816  | <0.001 |
|                                |         | LNGardenSize     | 2 | 0.477  | 1.684  | 0.092  |
|                                |         | LNNumFlowers     | 2 | 0.216  | 1.244  | 0.214  |
|                                |         | Mulch1m          | 1 | -0.018 | 1.263  | 0.207  |
|                                |         | Natural2km       | 1 | 0.011  | 0.917  | 0.359  |
| LNNumNativeLikelyNativeSpiders | average | (Intercept)      | 5 | 3.529  | 6.063  | <0.001 |
|                                |         | Mulch1m          | 2 | -0.029 | 1.529  | 0.126  |
|                                |         | LNGardenSize     | 1 | 0.446  | 1.195  | 0.232  |
|                                |         | Natural2km       | 1 | 0.015  | 1.017  | 0.309  |
| LNNumNativeSpiders             | average | (Intercept)      | 3 | 2.961  | 5.06   | <0.001 |
|                                |         | Natural2km       | 1 | 0.021  | 1.195  | 0.232  |
|                                |         | Mulch1m          | 1 | -0.02  | 0.869  | 0.385  |
| NonNativeSpiderIndiv           | best    | (Intercept)      | 1 | -6.057 | -0.795 | 0.438  |
|                                |         | LnNumFlowers     | 1 | 3.488  | 2.395  | 0.028  |
| NumSpiderSpp                   | average | (Intercept)      | 2 | 1.739  | 6.135  | <0.001 |
|                                |         | LNNumFlowers     | 2 | 0.123  | 2.344  | 0.019  |
|                                |         | LNGardenSize     | 1 | 0.127  | 1.299  | 0.194  |
| NumNativeLikelyNativeSpiderSpp | average | (Intercept)      | 2 | 1.473  | 3.933  | <0.001 |
|                                |         | LNNumFlowers     | 1 | 0.099  | 1.434  | 0.151  |
| NumNativeSpiderSpp             | average | (Intercept)      | 5 | 1.804  | 2.068  | 0.039  |
|                                |         | Natural2km       | 2 | 0.022  | 1.531  | 0.126  |
|                                |         | LNNativePlantSpp | 2 | -1.459 | 2.036  | 0.042  |
|                                |         | LNNumFlowers     | 2 | 0.474  | 1.988  | 0.047  |
|                                |         | LNNumTreesShrubs | 1 | 0.405  | 1.407  | 0.159  |
| NonNativeSpiderSpp             | average | (Intercept)      | 2 | 0.321  | 0.429  | 0.66   |
|                                |         | LNGardenSize     | 2 | 0.903  | 4.1    | <0.001 |
|                                |         | LNNumTreesShrubs | 1 | 0.3    | 2.038  | 0.041  |
|                                |         | Mulch1m          | 2 | 0.023  | 2.053  | 0.04   |
|                                |         | LNNumFlowers     | 2 | 0.279  | 2.403  | 0.016  |
| NumAntOccur                    | average | (Intercept)      | 3 | 3.562  | 44.037 | <0.001 |
|                                |         | Mulch1m          | 1 | 0.004  | 1.888  | 0.059  |
|                                |         | LNNumTreesShrubs | 1 | 0.054  | 1.484  | 0.138  |
| NumNativeAntOccur              | best    | (Intercept)      | 1 | 1.477  | 7.341  | <0.001 |
|                                |         | Natural2km       | 1 | 0.017  | 2.478  | 0.024  |
| LNNumNonNativeAntOccur         | average | (Intercept)      | 5 | 3.509  | 14.488 | <0.001 |
|                                |         | LNNumFlowers     | 2 | -0.071 | 1.419  | 0.156  |
|                                |         | Mulch1m          | 2 | 0.005  | 1.296  | 0.195  |
|                                |         | Natural2km       | 1 | -0.003 | 0.922  | 0.356  |
| NumAntSpp                      | best    | (Intercept)      | 1 | 3.579  | 12.82  | <0.001 |
| NumNativeAntSpp                | best    | (Intercept)      | 1 | 1.421  | 8.945  | <0.001 |

|                       |         |                  |   |        |       |        |
|-----------------------|---------|------------------|---|--------|-------|--------|
| NumNonNativeAntSpp    | average | (Intercept)      | 3 | 2.401  | 4.234 | <0.001 |
|                       |         | LNNumFlowers     | 1 | -0.16  | 1.067 | 0.286  |
|                       |         | Natural2km       | 1 | -0.009 | 0.847 | 0.397  |
| NumLinepithema.humile | average | (Intercept)      | 3 | 17.507 | 3.773 | <0.001 |
|                       |         | LNNumTreesShrubs | 1 | 3.074  | 1.408 | 0.159  |
|                       |         | LNGardenSize     | 1 | -2.503 | 0.897 | 0.370  |
| NumHarmonia.axyridis  | average | (Intercept)      | 2 | 1.247  | 5.922 | <0.001 |
|                       |         | Natural2km       | 2 | -0.015 | 2.507 | 0.012  |
|                       |         | Mulch1m          | 1 | -0.007 | 1.014 | 0.310  |

\* z-score for averaged models, t-score for best models

29

30

31

**Figure S1.** Photo of a sticky trap and a pitfall trap before placing the cover (A) and a pitfall trap with the green plastic plate cover (B) in urban garden study sites.

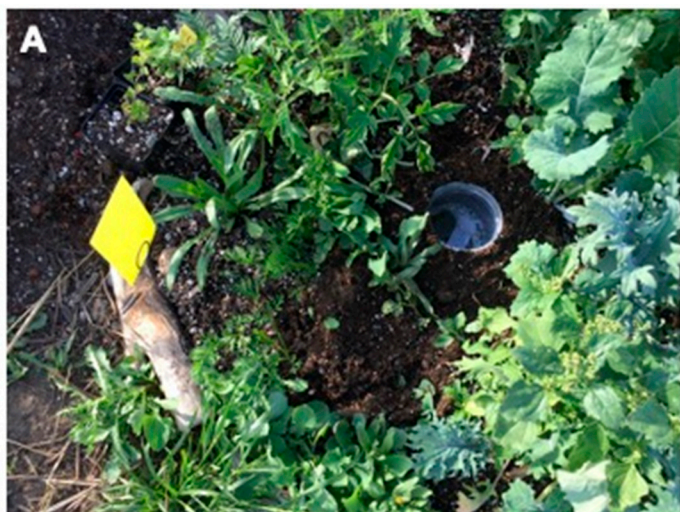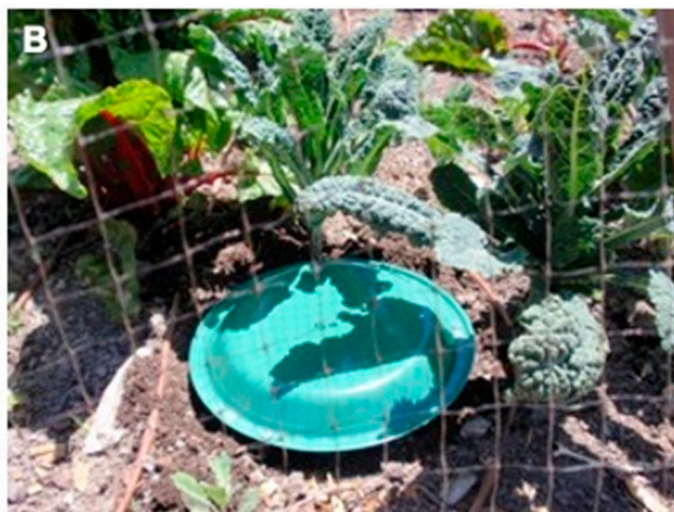

34

35

36

**Figure S2.** Significant relationships between abundance of the non-native ladybug species *Harmonia axyridis* and one landscape factor (natural habitat cover within 2 km) in urban gardens in the California Central Coast. The relationship is significant at  $P=0.012$ .

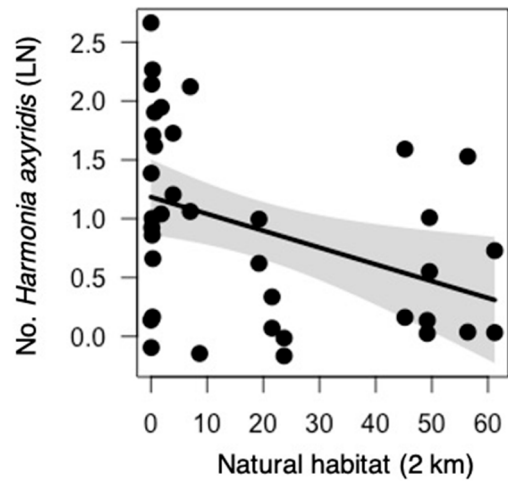

Supplement: s1 [file s1]
